# Supplementary material
Source: PubMed Central journal article supplement (PMC10330368)
Supplement: NIHMS1897607-supplement-1.pdf [file NIHMS1897607-supplement-1.pdf]

**Appendix. Comparison of Samples with and without a Baseline HABC Monitor**

|                            | <b>Baseline HABC Monitor<br/>(n=143)</b> | <b>No Baseline HABC Monitor<br/>(n=73)</b> | <b>P-value</b> |
|----------------------------|------------------------------------------|--------------------------------------------|----------------|
| Age                        |                                          |                                            | 0.995          |
| 50-64                      | 35.0% (50)                               | 35.6% (26)                                 |                |
| 65-79                      | 44.1% (63)                               | 43.8% (32)                                 |                |
| 80+                        | 21.0% (30)                               | 20.6 % (15)                                |                |
| Female                     | 52.4% (75)                               | 53.4% (39)                                 | 0.892          |
| Hispanic                   | 0.7% (1)                                 | 1.4% (1)                                   | 0.638          |
| Race                       |                                          |                                            | 0.575          |
| White                      | 89.4% (127)                              | 91.8% (67)                                 |                |
| African-American           | 9.2% (13)                                | 8.2% (6)                                   |                |
| Other                      | 1.4% (2)                                 | 0.0% (0)                                   |                |
| Hospital Length of Stay    | 7 (4-10)                                 | 7 (4-10)                                   | 0.856          |
| Mechanism of Injury        |                                          |                                            | 0.452          |
| Fall                       | 53.2% (76)                               | 57.5% (42)                                 |                |
| Motor Vehicle Accident     | 29.4% (42)                               | 31.5% (23)                                 |                |
| Other                      | 17.5% (25)                               | 11.0% (8)                                  |                |
| Injury Severity Score      | 10 (9-14)                                | 10 (9-14)                                  | 0.416          |
| Charlson Comorbidity Index | 0 (0-2)                                  | 0 (0-1)                                    | 0.973          |
| SF-36                      |                                          |                                            |                |
| Physical Functioning       | 20 (0-60)                                | 10 (5-55)                                  | 0.963          |
| Role Physical              | 0 (0-75)                                 | 50 (0-100)                                 | 0.029          |
| Role Emotional             | 100 (33-100)                             | 100 (33-100)                               | 0.664          |
| Pain                       | 35 (10-77.5)                             | 45 (12.5-80)                               | 0.309          |
| Vitality                   | 50 (35-70)                               | 50 (30-65)                                 | 0.515          |
| Emotional Well Being       | 76 (60-92)                               | 80 (56-88)                                 | 0.949          |
| General Health             | 70 (45-85)                               | 60 (45-75)                                 | 0.215          |
| Social Functioning         | 75 (37.5 – 100)                          | 75 (37.5-100)                              | 0.613          |
| Katz ADL                   | 6 (6-6)                                  | 6 (6-6)                                    | 0.888          |
| Lawton IADL                | 8 (8-8)                                  | 8 (8-8)                                    | 0.674          |

Values are expressed as % (n) or median (interquartile range).

SF-36, Short Form-36 Health Survey; Katz ADL, Katz Index of Independence in Activities of Daily Living; Lawton IADL, The Lawton Instrumental Activities of Daily Living Scale
